# Supplementary material for: Discrepancy between the Demand and Supply of Intensive Care Unit Beds in South Korea from 2011 to 2019: A Cross-Sectional Analysis
Source: PubMed Central journal article supplement — Yonsei Med J. 2021 Nov 16;62(12):1098–106. doi: 10.3349/ymj.2021.62.12.1098 (PMC8612860; doi:10.3349/ymj.2021.62.12.1098), 2021-11-16
Supplement: ymj-62-1098-s001.pdf [file ymj-62-1098-s001.pdf]

**Supplementary Table 1.** Codes of ICU Length of Days from the HIRA Database

| <b>Items</b>                                           | <b>Codes</b>                                                  |
|--------------------------------------------------------|---------------------------------------------------------------|
| Tertiary general hospital, adult ICU admission fee     | AJ100, AJ110, AJ120, AJ143, AJ150                             |
| General hospital, adult ICU admission fee              | AJ200, AJ210, AJ220, AJ230, AJ240, AJ250, AJ260, AJ280, AJ290 |
| Tertiary general hospital, pediatric ICU admission fee | AJ102, AJ112, AJ122, AJ132, AJ152                             |
| General hospital, pediatric ICU admission fee          | AJ202, AJ212, AJ222, AJ232, AJ252                             |

ICU, intensive care unit; HIRA, Health Insurance Review and Assessment.
