# Supplementary material for: Discrepancy between the Demand and Supply of Intensive Care Unit Beds in South Korea from 2011 to 2019: A Cross-Sectional Analysis
Source: PubMed Central journal article supplement — Yonsei Med J. 2021 Nov 16;62(12):1098–106. doi: 10.3349/ymj.2021.62.12.1098 (PMC8612860; doi:10.3349/ymj.2021.62.12.1098), 2021-11-16
Supplement: ymj-62-1098-s002.pdf [file ymj-62-1098-s002.pdf]

**Supplementary Table 2.** Trends in Rate of ICU Beds (Per 100000 of Population Aged  $\geq 20$  Years) in South Korea, 2011–2019

| Administrative districts | ICU beds per 100 K of population $\geq 20$ years |      | Change, % | AAPC (95% CI)      | Trend 1   |                     | Trend 2   |                    |
|--------------------------|--------------------------------------------------|------|-----------|--------------------|-----------|---------------------|-----------|--------------------|
|                          | 2011                                             | 2019 | 2011–2019 | 2011–2019          | Years     | APC (95% CI)        | Years     | APC (95% CI)       |
| South Korea              | 18.5                                             | 19.5 | 5.4       | 0.7 (0.4 to -1.0)  | 2011–2013 | -0.5 (-2.2 to 1.2)  | 2013–2019 | 1.1 (0.8 to 1.4)   |
| Seoul                    | 22.6                                             | 23.1 | 2.2       | 0.2 (-0.2 to 0.7)  | 2011–2015 | -1 (-1.9 to -0.1)   | 2015–2019 | 1.5 (0.6 to 2.3)   |
| Busan                    | 21.3                                             | 23.5 | 10.3      | 1.4 (0.8 to 1.9)   | 2011–2019 | 1.4 (0.8 to 1.9)    |           |                    |
| Incheon                  | 15.9                                             | 20.0 | 25.8      | 3 (2.4 to 3.6)     | 2011–2014 | 6.6 (4.6 to 8.5)    | 2014–2019 | 1 (0.2 to 1.7)     |
| Daegu                    | 16.1                                             | 18.6 | 15.5      | 1.5 (-0.1 to 3.1)  | 2011–2014 | -1.1 (-5.7 to 3.8)  | 2014–2019 | 3.1 (1 to 5.2)     |
| Gwangju                  | 25.1                                             | 29.0 | 15.5      | 2.2 (0.9 to 3.4)   | 2011–2013 | -3.4 (-9.3 to 2.8)  | 2013–2019 | 4.1 (3.1 to 5.1)   |
| Daejeon                  | 23.1                                             | 23.4 | 1.3       | 0.1 (-0.8 to 1.0)  | 2011–2014 | 1.8 (-1.0 to 4.6)   | 2014–2019 | -1 (-2.1 to 0.2)   |
| Ulsan                    | 14.3                                             | 14.3 | 0.0       | 1.5 (-0.7 to 3.8)  | 2011–2019 | -0.9 (-3.5 to 1.7)  |           |                    |
| Gyeonggi-do              | 14.2                                             | 14.8 | 4.2       | 0.8 (0.3 to 1.3)   | 2011–2019 | 0.8 (0.3 to 1.3)    |           |                    |
| Gangwon-do               | 27.3                                             | 28.5 | 4.4       | 0.2 (-0.8 to 1.2)  | 2011–2019 | 0.2 (-0.8 to 1.2)   |           |                    |
| Chungcheongbuk-do        | 18.1                                             | 20.1 | 11.0      | 2.2 (0.9 to 3.5)   | 2011–2019 | 2.2 (0.9 to 3.5)    |           |                    |
| Chungcheongnam-do        | 14.5                                             | 14.6 | 0.7       | 0 (-1.6 to 1.6)    | 2011–2015 | 2.2 (-1.2 to 5.6)   | 2015–2019 | -2.2 (-5.2 to 0.9) |
| Jeollabuk-do             | 17.2                                             | 21.1 | 22.7      | 2.4 (1.1 to 3.7)   | 2011–2019 | 2.4 (1.1 to 3.7)    |           |                    |
| Jeollanam-do             | 22.1                                             | 22.7 | 2.7       | 0.3 (-1.5 to 2.1)  | 2011–2013 | -4.4 (-12.7 to 4.6) | 2013–2019 | 1.9 (0.4 to 3.5)   |
| Gyeongsangbuk-do         | 17.9                                             | 20.7 | 15.6      | 2.1 (0.8 to 3.3)   | 2011–2019 | 2.1 (0.8 to 3.3)    |           |                    |
| Gyeongsangnam-do         | 13.5                                             | 14.3 | 5.9       | 0.7 (0.1 to 1.4)   | 2011–2013 | -4.6 (-7.8 to -1.2) | 2013–2019 | 2.6 (2 to 3.2)     |
| Jeju-do                  | 29.4                                             | 23.7 | -19.4     | -3.1 (-6.3 to 0.3) | 2011–2013 | 5.4 (-11.4 to 25.6) | 2013–2019 | -5.7 (-8.4 to -3)  |

AAPC, average annual percent change; APC, annual percent change; ICU, intensive care unit; K, thousand; CI, confidence interval.
