# Supplementary material for: Discrepancy between the Demand and Supply of Intensive Care Unit Beds in South Korea from 2011 to 2019: A Cross-Sectional Analysis
Source: PubMed Central journal article supplement — Yonsei Med J. 2021 Nov 16;62(12):1098–106. doi: 10.3349/ymj.2021.62.12.1098 (PMC8612860; doi:10.3349/ymj.2021.62.12.1098), 2021-11-16
Supplement: ymj-62-1098-s003.pdf [file ymj-62-1098-s003.pdf]

**Supplementary Table 3.** Trends in Rate of ICU Beds (Per 100000 of Population Aged ≥65 Years) in South Korea, 2011–2019

| Administrative districts | ICU bed per 100 K of population ≥65 years |       | Change, % | AAPC (95% CI)       | Trend 1   |                     | Trend 2   |                     |
|--------------------------|-------------------------------------------|-------|-----------|---------------------|-----------|---------------------|-----------|---------------------|
|                          | 2011                                      | 2019  | 2011–2019 | 2011–2019           | Years     | APC (95% CI)        | Years     | APC (95% CI)        |
| South Korea              | 127.6                                     | 104.0 | -18.5     | -2.3 (-2.7 to -2.0) | 2011–2019 | -2.3 (-2.7 to -2.0) |           |                     |
| Seoul                    | 177.7                                     | 129.0 | -27.4     | -4 (-4.5 to -3.4)   | 2011–2014 | -6 (-7.5 to -4.4)   | 2014–2019 | -2.8 (-3.5 to -2)   |
| Busan                    | 145.2                                     | 109.5 | -24.6     | -3.3 (-3.9 to -2.7) | 2011–2019 | -3.3 (-3.9 to -2.7) |           |                     |
| Incheon                  | 136.9                                     | 126.6 | -7.5      | -1 (-1.8 to -0.1)   | 2011–2015 | 1.8 (0 to 3.7)      | 2015–2019 | -3.7 (-5.2 to -2.1) |
| Daegu                    | 120.0                                     | 98.6  | -17.8     | -2.8 (-3.8 to -1.9) | 2011–2013 | -6.9 (-11.6 to -2)  | 2013–2019 | -1.4 (-2.3 to -0.6) |
| Gwangju                  | 199.4                                     | 172.9 | -13.3     | -1.4 (-2.6 to -0.2) | 2011–2013 | -7.4 (-13 to -1.6)  | 2013–2019 | 0.7 (-0.3 to 1.7)   |
| Daejeon                  | 195.2                                     | 141.4 | -27.6     | -3.9 (-4.5 to -3.4) | 2011–2014 | -2 (-3.7 to -0.3)   | 2014–2019 | -5.1 (-5.8 to -4.3) |
| Ulsan                    | 151.6                                     | 100.3 | -33.8     | -3.6 (-5.7 to -1.5) | 2011–2019 | -5.9 (-8.2 to -3.5) |           |                     |
| Gyeonggi-do              | 119.2                                     | 96.2  | -19.3     | -2.3 (-3 to -1.6)   | 2011–2019 | -2.3 (-3 to -1.6)   |           |                     |
| Gangwon-do               | 141.1                                     | 121.2 | -14.1     | -2 (-2.9 to -1.1)   | 2011–2019 | -2 (-2.9 to -1.1)   |           |                     |
| Chungcheongbuk-do        | 104.1                                     | 96.6  | -7.2      | 0 (-1.3 to 1.3)     | 2011–2019 | 0 (-1.3 to 1.3)     |           |                     |
| Chungcheongnam-do        | 74.9                                      | 69.5  | -7.2      | -0.9 (-2.5 to 0.6)  | 2011–2015 | 1.3 (-1.9 to 4.7)   | 2015–2019 | -3.2 (-6.1 to -0.2) |
| Jeollabuk-do             | 85.3                                      | 85.5  | 0.2       | -0.1 (-1.3 to 1.2)  | 2011–2019 | -0.1 (-1.3 to 1.2)  |           |                     |
| Jeollanam-do             | 93.4                                      | 83.3  | -10.8     | -1.4 (-3.2 to 0.5)  | 2011–2013 | -6.3 (-14.8 to 3)   | 2013–2019 | 0.3 (-1.3 to 2)     |
| Gyeongsangbuk-do         | 90.2                                      | 83.9  | -7.0      | -0.6 (-1.8 to 0.6)  | 2011–2019 | -0.6 (-1.8 to 0.6)  |           |                     |
| Gyeongsangnam-do         | 85.9                                      | 71.3  | -17.0     | -2.1 (-2.7 to -1.4) | 2011–2013 | -6.8 (-9.9 to -3.6) | 2013–2019 | -0.5 (-1 to 0.1)    |
| Jeju-do                  | 175.0                                     | 126.5 | -27.7     | -4.1 (-6.9 to -1.4) | 2011–2013 | 3.6 (-10.5 to 19.8) | 2013–2019 | -6.6 (-8.8 to -4.3) |

AAPC, average annual percent change; APC, annual percent change; ICU, intensive care unit; K, thousand; CI, confidence interval.
