# Supplementary material for: Discrepancy between the Demand and Supply of Intensive Care Unit Beds in South Korea from 2011 to 2019: A Cross-Sectional Analysis
Source: PubMed Central journal article supplement — Yonsei Med J. 2021 Nov 16;62(12):1098–106. doi: 10.3349/ymj.2021.62.12.1098 (PMC8612860; doi:10.3349/ymj.2021.62.12.1098), 2021-11-16
Supplement: ymj-62-1098-s004.pdf [file ymj-62-1098-s004.pdf]

**Supplementary Table 4.** Trends in ICU Length of Stay of Adult Population (Aged ≥20 Years) in South Korea, 2011–2019

| Administrative districts | ICU days of population ≥20 years (K) |        | Change, % | AAPC (95% CI)       | Trend 1   |                     | Trend 2   |                     |
|--------------------------|--------------------------------------|--------|-----------|---------------------|-----------|---------------------|-----------|---------------------|
|                          | 2011                                 | 2019   | 2011–2019 | 2011–2019           | Years     | APC (95% CI)        | Years     | APC (95% CI)        |
| South Korea              | 1493.5                               | 2148.1 | 43.8      | 5.1 (4.4 to 5.7)    | 2011–2019 | 5.1 (4.4 to 5.7)    |           |                     |
| Seoul                    | 415.7                                | 508.1  | 22.2      | 2.5 (2.2 to 2.8)    | 2011–2019 | 2.5 (2.2 to 2.8)    |           |                     |
| Busan                    | 123.0                                | 159.1  | 29.3      | 3.5 (2.6 to 4.4)    | 2011–2019 | 3.5 (2.6 to 4.4)    |           |                     |
| Incheon                  | 68.3                                 | 133.7  | 95.8      | 9.3 (4.3 to 14.6)   | 2011–2015 | 18.1 (7.5 to 29.8)  | 2015–2019 | 1.2 (-7.9 to 11.2)  |
| Daegu                    | 41.1                                 | 93.9   | 128.5     | 12.6 (10.5 to 14.8) | 2011–2019 | 12.6 (10.5 to 14.8) |           |                     |
| Gwangju                  | 28.1                                 | 84.0   | 198.9     | 16.6 (11.1 to 22.5) | 2011–2019 | 16.6 (11.1 to 22.5) |           |                     |
| Daejeon                  | 41.9                                 | 77.8   | 85.7      | 7.5 (3.9 to 11.2)   | 2011–2015 | 16 (8.3 to 24.2)    | 2015–2019 | -0.4 (-7 to 6.7)    |
| Ulsan                    | 30.4                                 | 36.2   | 19.1      | 2.3 (1.2 to 3.5)    | 2011–2015 | -1.1 (-3.3 to 1.2)  | 2015–2019 | 5.8 (3.4 to 8.2)    |
| Gyeonggi-do              | 302.4                                | 412.7  | 36.5      | 4.3 (3.9 to 4.7)    | 2011–2019 | 4.3 (3.9 to 4.7)    |           |                     |
| Gangwon-do               | 56.1                                 | 95.3   | 69.9      | 8.7 (6.5 to 10.9)   | 2011–2019 | 8.7 (6.5 to 10.9)   |           |                     |
| Chungcheongbuk-do        | 47.5                                 | 63.9   | 34.5      | 5.1 (2.6 to 7.7)    | 2011–2019 | 5.1 (2.6 to 7.7)    |           |                     |
| Chungcheongnam-do        | 36.2                                 | 84.0   | 132.0     | 12.5 (9.7 to 15.4)  | 2011–2019 | 12.5 (9.7 to 15.4)  |           |                     |
| Jeollabuk-do             | 57.5                                 | 67.6   | 17.6      | 3.0 (1.3 to 4.7)    | 2011–2019 | 3.0 (1.3 to 4.7)    |           |                     |
| Jeollanam-do             | 64.6                                 | 81.7   | 26.5      | 4.0 (2.2 to 5.8)    | 2011–2019 | 4.0 (2.2 to 5.8)    |           |                     |
| Gyeongsangbuk-do         | 83.7                                 | 113.2  | 35.2      | 4.3 (3.0 to 5.5)    | 2011–2019 | 4.3 (3.0 to 5.5)    |           |                     |
| Gyeongsangnam-do         | 61.7                                 | 102.0  | 65.3      | 5.9 (5.2 to 6.6)    | 2011–2019 | 5.9 (5.2 to 6.6)    |           |                     |
| Jeju-do                  | 34.9                                 | 34.5   | -1.1      | 0.1 (-0.9 to 1.1)   | 2011–2015 | 3.0 (0.9 to 5)      | 2015–2019 | -2.8 (-4.7 to -0.8) |

AAPC, average annual percent change; APC, annual percent change; ICU, intensive care unit; K, thousand; CI, confidence interval.
