# Supplementary material for: Discrepancy between the Demand and Supply of Intensive Care Unit Beds in South Korea from 2011 to 2019: A Cross-Sectional Analysis
Source: PubMed Central journal article supplement — Yonsei Med J. 2021 Nov 16;62(12):1098–106. doi: 10.3349/ymj.2021.62.12.1098 (PMC8612860; doi:10.3349/ymj.2021.62.12.1098), 2021-11-16
Supplement: ymj-62-1098-s005.pdf [file ymj-62-1098-s005.pdf]

**Supplementary Table 5.** Trends in ICU Length of Stay of Adult Population (Aged ≥65 Years) in South Korea, 2011–2019

| Administrative districts | ICU days of population ≥65 years (K) |        | Change, % | AAPC (95% CI)       | Trend 1   |                     | Trend 2   |                    |
|--------------------------|--------------------------------------|--------|-----------|---------------------|-----------|---------------------|-----------|--------------------|
|                          | 2011                                 | 2019   | 2011–2019 | 2011–2019           | Years     | APC (95% CI)        | Years     | APC (95% CI)       |
| South Korea              | 903.6                                | 1406.1 | 55.6      | 6.1 (5.4 to 6.7)    | 2011–2019 | 6.1 (5.4 to 6.7)    |           |                    |
| Seoul                    | 226.2                                | 314.5  | 39.0      | 4.1 (3.6 to 4.5)    | 2011–2019 | 4.1 (3.6 to 4.5)    |           |                    |
| Busan                    | 74.4                                 | 105.4  | 41.7      | 4.5 (3.5 to 5.4)    | 2011–2019 | 4.5 (3.5 to 5.4)    |           |                    |
| Incheon                  | 40.8                                 | 84.6   | 107.4     | 10.1 (6.3 to 14)    | 2011–2015 | 18.6 (10.6 to 27.3) | 2015–2019 | 2.2 (-4.8 to 9.6)  |
| Daegu                    | 25.0                                 | 60.2   | 140.8     | 13.5 (11.2 to 15.8) | 2011–2019 | 13.5 (11.2 to 15.8) |           |                    |
| Gwangju                  | 20.1                                 | 59.1   | 194.0     | 15.9 (11 to 21.1)   | 2011–2019 | 15.9 (11 to 21.1)   |           |                    |
| Daejeon                  | 27.4                                 | 52.3   | 90.9      | 8.0 (4.1 to 12)     | 2011–2015 | 15.6 (7.4 to 24.2)  | 2015–2019 | 0.9 (-6.2 to 8.6)  |
| Ulsan                    | 16.8                                 | 21.5   | 28.0      | 3.4 (0.7 to 6.1)    | 2011–2014 | -4.8 (-12.1 to 3)   | 2014–2019 | 8.6 (4.8 to 12.5)  |
| Gyeonggi-do              | 179.8                                | 262.7  | 46.1      | 5.1 (4.7 to 5.6)    | 2011–2019 | 5.1 (4.7 to 5.6)    |           |                    |
| Gangwon-do               | 36.4                                 | 65.7   | 80.5      | 9.2 (7.4 to 11.1)   | 2011–2019 | 9.2 (7.4 to 11.1)   |           |                    |
| Chungcheongbuk-do        | 31.3                                 | 44.5   | 42.2      | 5.6 (3.4 to 7.8)    | 2011–2019 | 5.6 (3.4 to 7.8)    |           |                    |
| Chungcheongnam-do        | 25.0                                 | 57.8   | 131.2     | 11.8 (9.3 to 14.5)  | 2011–2019 | 11.8 (9.3 to 14.5)  |           |                    |
| Jeollabuk-do             | 40.0                                 | 47.3   | 18.3      | 3.2 (1.8 to 4.7)    | 2011–2019 | 3.2 (1.8 to 4.7)    |           |                    |
| Jeollanam-do             | 43.9                                 | 62.6   | 42.6      | 5.6 (3.6 to 7.6)    | 2011–2019 | 5.6 (3.6 to 7.6)    |           |                    |
| Gyeongsangbuk-do         | 57.2                                 | 82.4   | 44.1      | 5.3 (4.2 to 6.4)    | 2011–2019 | 5.3 (4.2 to 6.4)    |           |                    |
| Gyeongsangnam-do         | 36.0                                 | 64.1   | 78.1      | 6.9 (5.8 to 8.0)    | 2011–2019 | 6.9 (5.8 to 8.0)    |           |                    |
| Jeju-do                  | 22.7                                 | 20.9   | -7.9      | -0.4 (-2.5 to 1.9)  | 2011–2015 | 3.6 (-0.9 to 8.3)   | 2015–2019 | -4.2 (-8.4 to 0.2) |

AAPC, average annual percent change; APC, annual percent change; ICU, intensive care unit; K, thousand; CI, confidence interval.
