# Supplementary material for: Discrepancy between the Demand and Supply of Intensive Care Unit Beds in South Korea from 2011 to 2019: A Cross-Sectional Analysis
Source: PubMed Central journal article supplement — Yonsei Med J. 2021 Nov 16;62(12):1098–106. doi: 10.3349/ymj.2021.62.12.1098 (PMC8612860; doi:10.3349/ymj.2021.62.12.1098), 2021-11-16
Supplement: ymj-62-1098-s006.pdf [file ymj-62-1098-s006.pdf]

**Supplementary Table 6.** Predicted ICU Length of Stay in South Korea in 2030 and 2040 Using the ARIMA Model

| Administrative districts | 2019–Actual |                        |                    | 2030–Predicted         |               |                        |                             | 2040–Predicted         |               |                         |                             |
|--------------------------|-------------|------------------------|--------------------|------------------------|---------------|------------------------|-----------------------------|------------------------|---------------|-------------------------|-----------------------------|
|                          | ICU Beds    | ICU length of stay (K) | Occupancy rate (%) | ICU length of stay (K) | 95% CI        | Occupancy rate (%)*    | ICU bed demand <sup>†</sup> | ICU length of stay (K) | 95% CI        | Occupancy rate (%)*     | ICU bed demand <sup>†</sup> |
| South Korea              | 8344        | 2219.1                 | 72.9               | 3126.8                 | 2884.8–3368.9 | 102.7<br>(94.7–110.6)  | 10708.2                     | 3952.1                 | 3617.7–4286.6 | 129.8<br>(118.8–140.7)  | 13534.6                     |
| Seoul                    | 1907        | 542.8                  | 78.0               | 665.1                  | 654.2–676.0   | 95.6<br>(94–97.1)      | 2277.7                      | 775.0                  | 764.1–785.9   | 111.3<br>(109.8–112.9)  | 2654.1                      |
| Busan                    | 679         | 160.8                  | 64.9               | 208.9                  | 179.0–238.9   | 84.3<br>(72.2–96.4)    | 715.4                       | 252.7                  | 211.3–294.1   | 102<br>(85.3–118.7)     | 865.4                       |
| Incheon                  | 487         | 136.3                  | 76.7               | 153.8                  | 127.3–180.2   | 86.5<br>(71.6–101.4)   | 526.7                       | 190.4                  | 153.8–226.9   | 107.1<br>(86.5–127.6)   | 652.1                       |
| Daegu                    | 374         | 99.3                   | 72.8               | 174.6                  | 142.1–207.2   | 127.9<br>(104.1–151.8) | 597.9                       | 243.1                  | 198.1–288.0   | 178.1<br>(145.1–211)    | 832.5                       |
| Gwangju                  | 338         | 87.1                   | 70.6               | 167.7                  | 105.0–230.5   | 135.9<br>(85.1–186.8)  | 574.3                       | 241.1                  | 154.4–327.8   | 195.4<br>(125.2–265.7)  | 825.7                       |
| Daejeon                  | 281         | 79.4                   | 77.4               | 79.4                   | 28.1–130.7    | 77.4<br>(27.4–127.4)   | 271.9                       | 79.4                   | 8.5–150.2     | 77.4<br>(8.3–146.4)     | 271.9                       |
| Ulsan                    | 133         | 36.7                   | 75.5               | 48.9                   | -2.9–100.8    | 100.7<br>(-6–207.6)    | 167.5                       | 60.1                   | -72.5–192.8   | 123.8<br>(-149.3–397.2) | 205.8                       |
| Gyeonggi-do              | 1588        | 421.9                  | 72.8               | 571.1                  | 525.6–616.7   | 98.5<br>(90.7–106.4)   | 1955.8                      | 706.8                  | 643.8–769.7   | 121.9<br>(111.1–132.8)  | 2420.5                      |
| Gangwon-do               | 367         | 98.0                   | 73.1               | 154.1                  | 112.6–195.6   | 115<br>(84.1–146)      | 527.7                       | 205.1                  | 147.8–262.5   | 153.1<br>(110.3–196)    | 702.4                       |
| Chungcheongbuk-do        | 264         | 64.5                   | 66.9               | 64.5                   | 32.2–96.7     | 66.9<br>(33.4–100.4)   | 220.9                       | 64.5                   | 19.9–109.0    | 66.9<br>(20.7–113.1)    | 220.9                       |
| Chungcheongnam-do        | 291         | 84.9                   | 79.9               | 151.4                  | 119.7–183.1   | 142.5<br>(112.7–172.4) | 518.5                       | 211.9                  | 168.1–255.7   | 199.5<br>(158.3–240.7)  | 725.7                       |
| Jeollabuk-do             | 317         | 70.5                   | 61.0               | 70.5                   | 45.6–95.4     | 60.9<br>(39.4–82.5)    | 241.4                       | 70.5                   | 36.1–104.9    | 60.9<br>(31.2–90.7)     | 241.4                       |
| Jeollanam-do             | 352         | 82.1                   | 63.9               | 82.0                   | 47.4–116.7    | 63.8<br>(36.9–90.8)    | 280.8                       | 82.0                   | 34.1–130.0    | 63.8<br>(26.5–101.2)    | 280.8                       |
| Gyeongsangbuk-do         | 461         | 113.5                  | 67.5               | 153.8                  | 127.3–180.2   | 91.4<br>(75.7–107.1)   | 526.7                       | 190.4                  | 153.8–226.9   | 113.2<br>(91.4–134.8)   | 652.1                       |
| Gyeongsangnam-do         | 391         | 105.8                  | 74.1               | 162.5                  | 147.0–178.0   | 113.9<br>(103–124.7)   | 556.5                       | 214.1                  | 192.6–235.5   | 150<br>(135–165)        | 733.2                       |
| Jeju-do                  | 127         | 35.4                   | 76.4               | 38.0                   | 34.5–41.4     | 82<br>(74.4–89.3)      | 130.1                       | 38.0                   | 34.5–41.4     | 82<br>(74.4–89.3)       | 130.1                       |

ICU, intensive care unit; ARIMA, autoregressive integrated moving average; K, thousand.

\*Occupancy rates in 2030 and 2040 calculated as [predicted number of ICU bed days (lower 95% CI–upper 95% CI)] ÷ (ICU beds at 2019×365 days); <sup>†</sup>Numbers of ICU beds calculated assuming an occupancy rate of 80%.
