# Supplementary material for: Discrepancy between the Demand and Supply of Intensive Care Unit Beds in South Korea from 2011 to 2019: A Cross-Sectional Analysis
Source: PubMed Central journal article supplement — Yonsei Med J. 2021 Nov 16;62(12):1098–106. doi: 10.3349/ymj.2021.62.12.1098 (PMC8612860; doi:10.3349/ymj.2021.62.12.1098), 2021-11-16
Supplement: ymj-62-1098-s007.pdf [file ymj-62-1098-s007.pdf]

**Supplementary Table 7.** Status of Hospital Beds and ICU Beds by Administrative Districts in 2019

|                   | Hospitals | Hospital beds | ICU beds | ICU beds/<br>Hospital beds | Population aged<br>≥20 years<br>(100 K) | Population aged<br>≥65 years<br>(100 K) | Hospital beds<br>per population<br>aged<br>≥20 years | ICU beds per<br>population aged<br>≥20 years | Hospital beds<br>per population<br>aged<br>≥65 years | ICU beds per<br>population<br>aged<br>≥65 years |
|-------------------|-----------|---------------|----------|----------------------------|-----------------------------------------|-----------------------------------------|------------------------------------------------------|----------------------------------------------|------------------------------------------------------|-------------------------------------------------|
| Seoul             | 57        | 32954         | 1907     | 0.058                      | 82.5                                    | 14.8                                    | 399.6                                                | 23.1                                         | 2228.6                                               | 129.0                                           |
| Busan             | 29        | 12871         | 679      | 0.053                      | 28.9                                    | 6.2                                     | 445.8                                                | 23.5                                         | 2075.6                                               | 109.5                                           |
| Incheon           | 19        | 8119          | 487      | 0.060                      | 24.3                                    | 3.8                                     | 333.9*                                               | 20.0                                         | 2111.3                                               | 126.6                                           |
| Daegu             | 16        | 7396          | 374      | 0.051                      | 20.1                                    | 3.8                                     | 367.5                                                | 18.6                                         | 1950.0                                               | 98.6                                            |
| Gwangju           | 23        | 7576          | 338      | 0.045                      | 11.7                                    | 2.0                                     | 650.0                                                | 29.0                                         | 3875.6                                               | 172.9                                           |
| Daejeon           | 10        | 5217          | 281      | 0.054                      | 12.0                                    | 2.0                                     | 434.8                                                | 23.4                                         | 2625.7                                               | 141.4                                           |
| Ulsan             | 8         | 3044          | 133      | 0.044                      | 9.3                                     | 1.3                                     | 328.4*                                               | 14.3*                                        | 2296.2                                               | 100.3                                           |
| Gyeonggi-do       | 64        | 25106         | 1588     | 0.063                      | 107.0                                   | 16.5                                    | 234.7*                                               | 14.8*                                        | 1520.3*                                              | 96.2                                            |
| Gangwon-do        | 15        | 5063          | 359      | 0.071                      | 12.9                                    | 3.0                                     | 393.0                                                | 27.9                                         | 1671.6                                               | 118.5                                           |
| Chungcheongbuk-do | 13        | 4484          | 264      | 0.059                      | 13.2                                    | 2.7                                     | 340.6                                                | 20.1                                         | 1639.9*                                              | 96.6                                            |
| Chungcheongnam-do | 13        | 5078          | 291      | 0.057                      | 19.9                                    | 4.2                                     | 255.6*                                               | 14.6*                                        | 1213.0*                                              | 69.5*                                           |
| Jeollabuk-do      | 13        | 5887          | 307      | 0.052                      | 15.0                                    | 3.7                                     | 392.6                                                | 20.5                                         | 1588.2*                                              | 82.8*                                           |
| Jeollanam-do      | 23        | 7125          | 352      | 0.049                      | 15.5                                    | 4.2                                     | 458.5                                                | 22.7                                         | 1686.2                                               | 83.3*                                           |
| Gyeongsangbuk-do  | 20        | 13282         | 461      | 0.035                      | 22.3                                    | 5.5                                     | 595.6                                                | 20.7                                         | 2417.5                                               | 83.9                                            |
| Gyeongsangnam-do  | 26        | 9424          | 391      | 0.041                      | 27.4                                    | 5.5                                     | 343.6                                                | 14.3*                                        | 1718.9                                               | 71.3*                                           |
| Jeju-do           | 6         | 2174          | 127      | 0.058                      | 5.4                                     | 1.0                                     | 405.2                                                | 23.7                                         | 2165.4                                               | 126.5                                           |

ICU, intensive care unit; K, thousand.

\*Values below 1st quartile of corresponding column.
